# Supplementary material for: SIRT7 regulates hepatocellular carcinoma response to therapy by altering the p53-dependent cell death pathway
Source: PubMed Central journal article supplement (PMC6567523; doi:10.1186/s13046-019-1246-4), 2019-06-13
Supplement: 13046_2019_1246_MOESM2_ESM.pdf [file 13046_2019_1246_MOESM2_ESM.pdf]

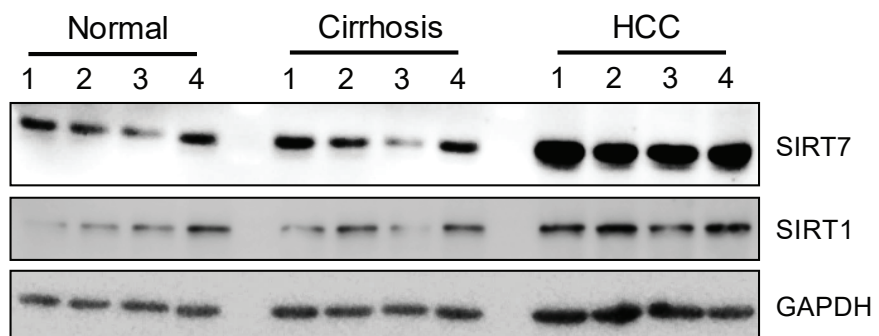

**Zhao et al. Figure S1**

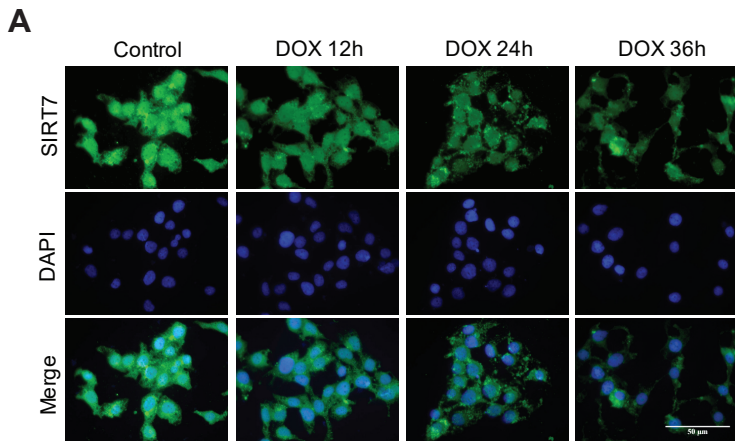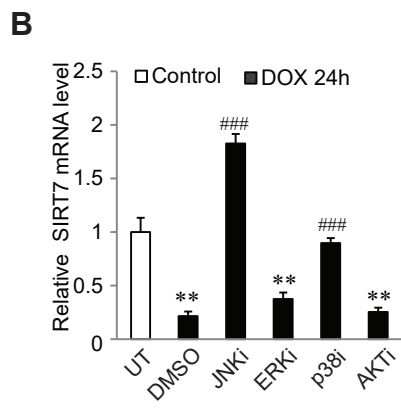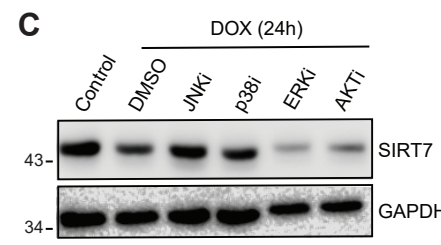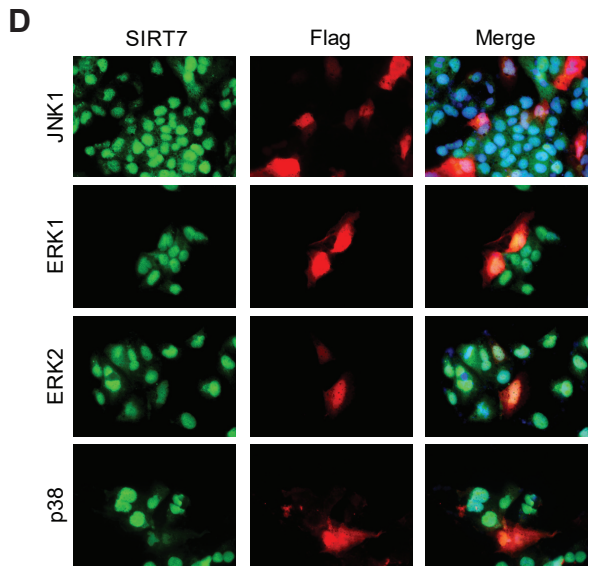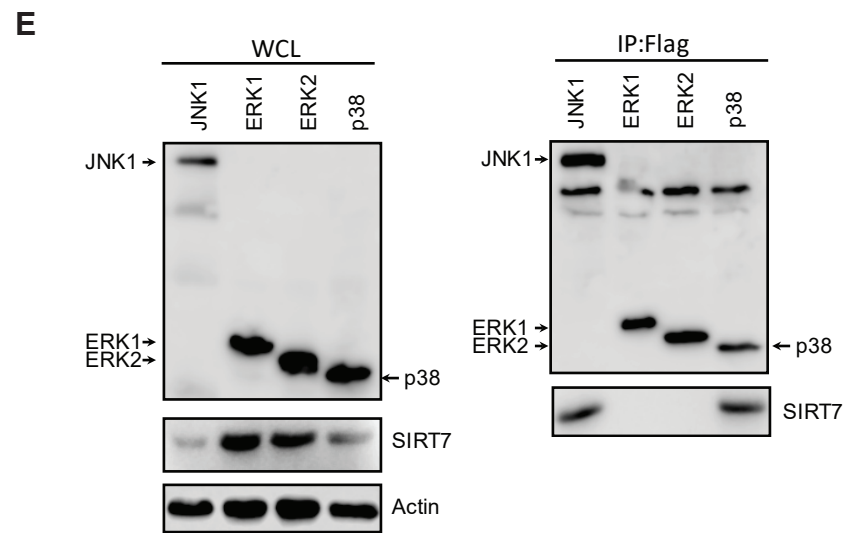

Zhao et al. Figure S2

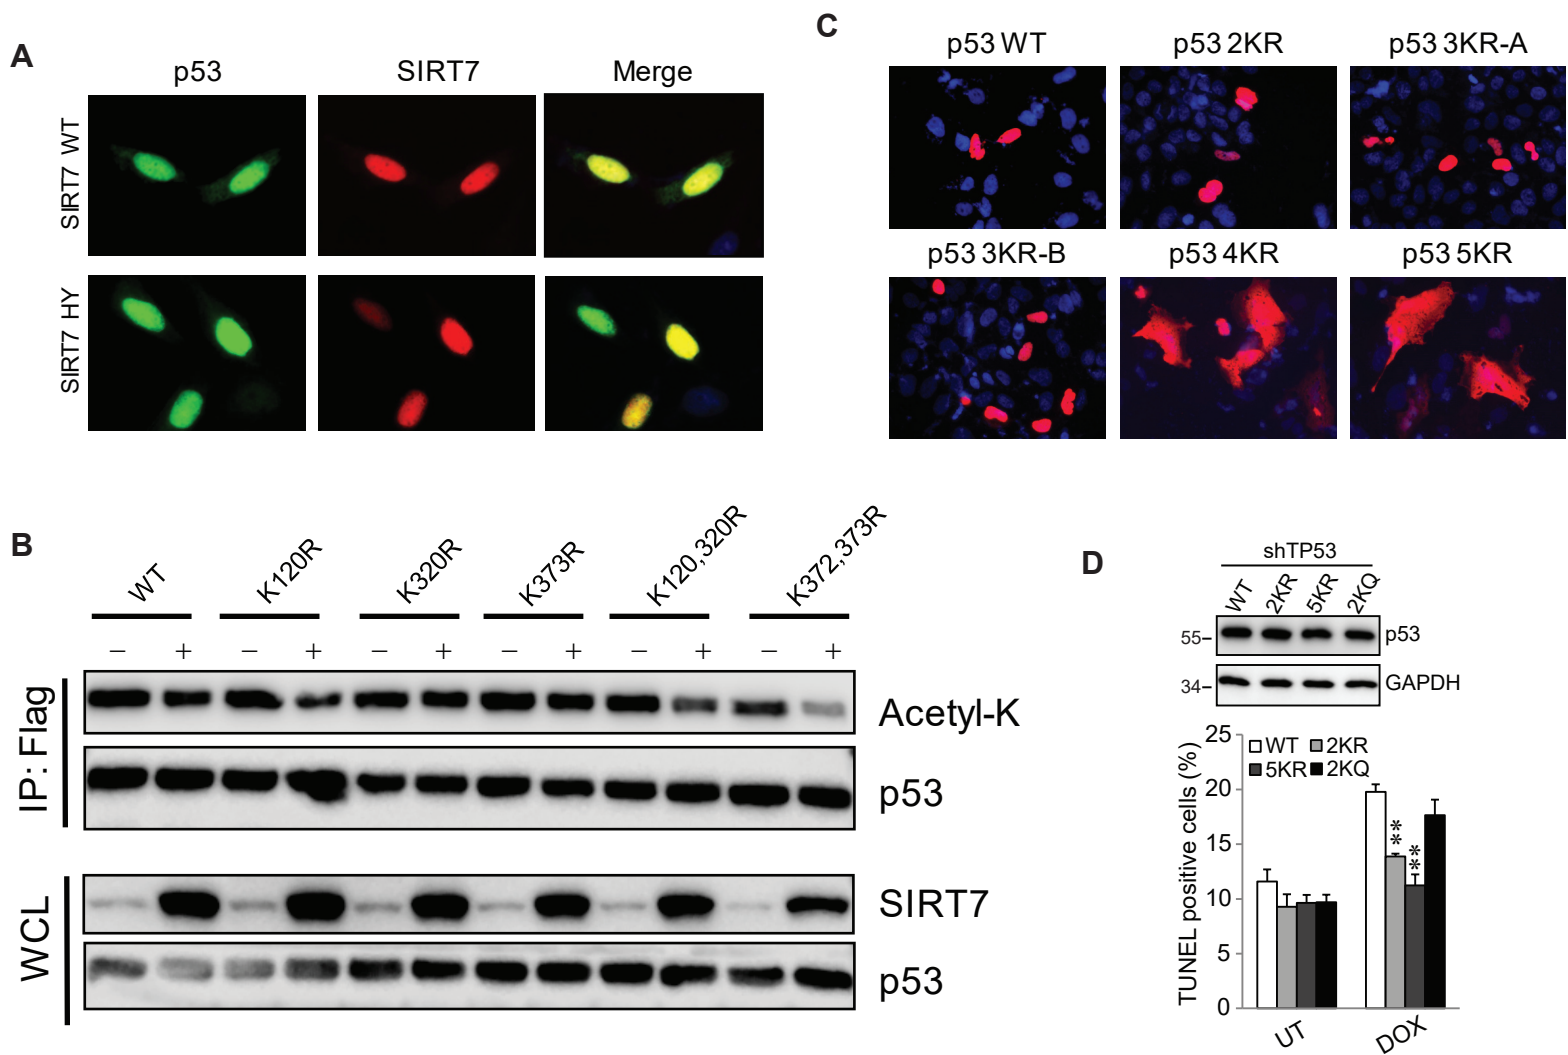

Zhao et al. Figure S3

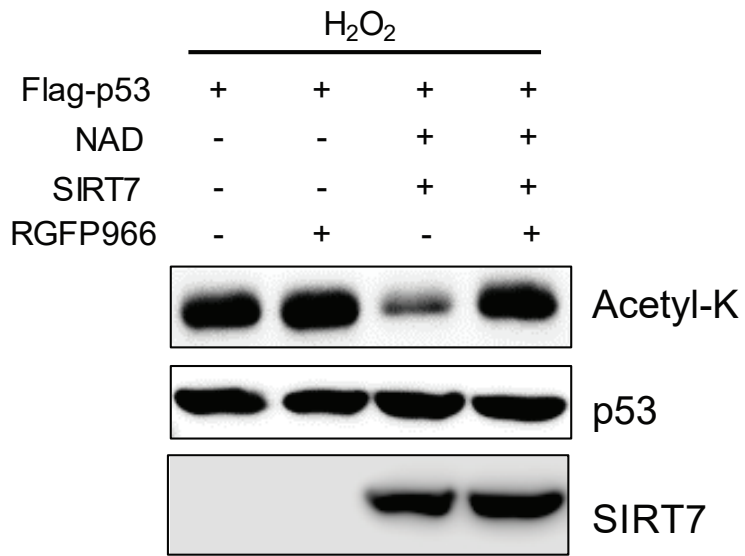

*Zhao et al. Figure S4*
